# Supplementary material for: Biomarker discovery by integrated joint non-negative matrix factorization and pathway signature analyses
Source: PubMed Central journal article supplement (PMC6021419; doi:10.1038/s41598-018-28066-w), 2018-06-27
Supplement: 41598_2018_28066_MOESM1_ESM.pdf [file 41598_2018_28066_MOESM1_ESM.pdf]

# **Biomarker discovery by integrated joint non-negative matrix factorization and pathway signature analyses**

Naoya Fujita<sup>1,2</sup>, Shinji Mizuarai<sup>2</sup>, Katsuhiko Murakami<sup>1</sup>, and Kenta Nakai<sup>1,\*</sup>

<sup>1</sup>Human Genome Center, the Institute of Medical Science, the University of Tokyo, Tokyo, Japan

<sup>2</sup>Discovery and Preclinical Research Division, Taiho Pharmaceutical Co., Ltd, Tsukuba, Japan

\*Corresponding author

Phone: +81-3-5449-5131

E-mail: [knakai@ims.u-tokyo.ac.jp](mailto:knakai@ims.u-tokyo.ac.jp)

**Supplementary Figures 1-6**

**Fig. S1**

Fig. S1a

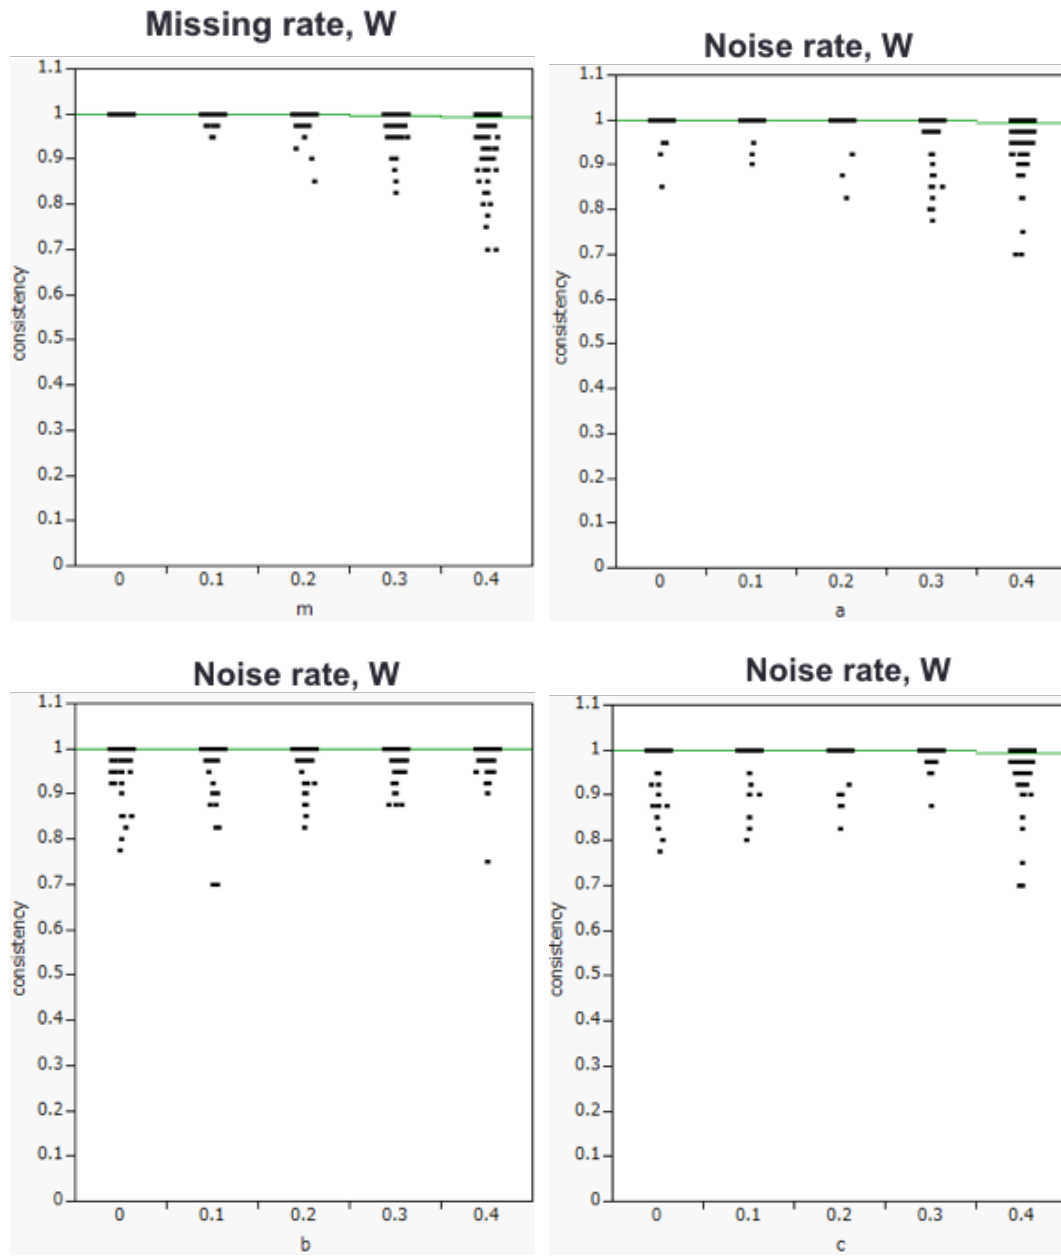

Fig. S1b

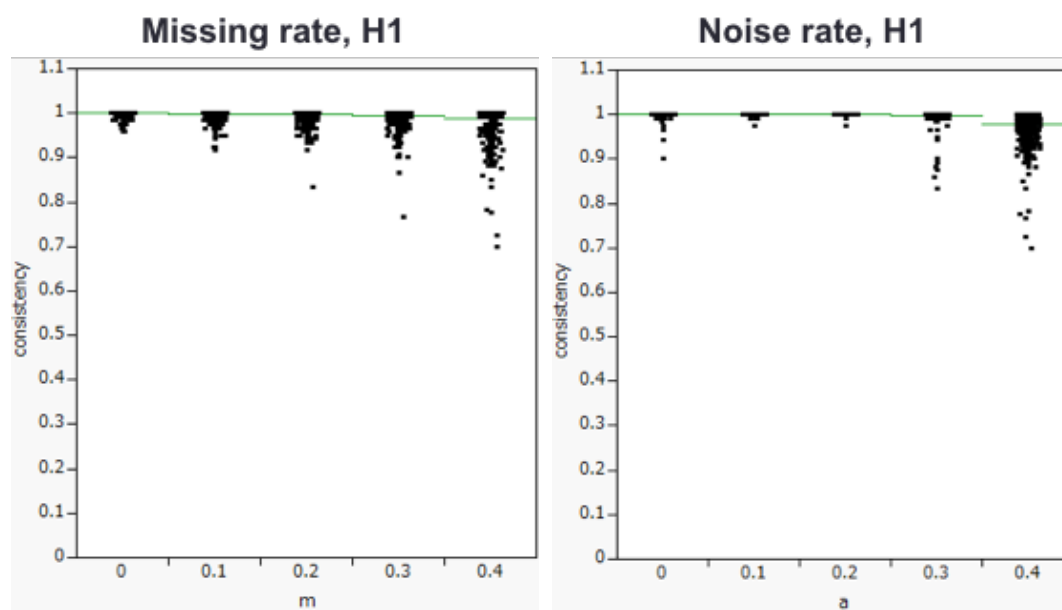

Fig. S1c

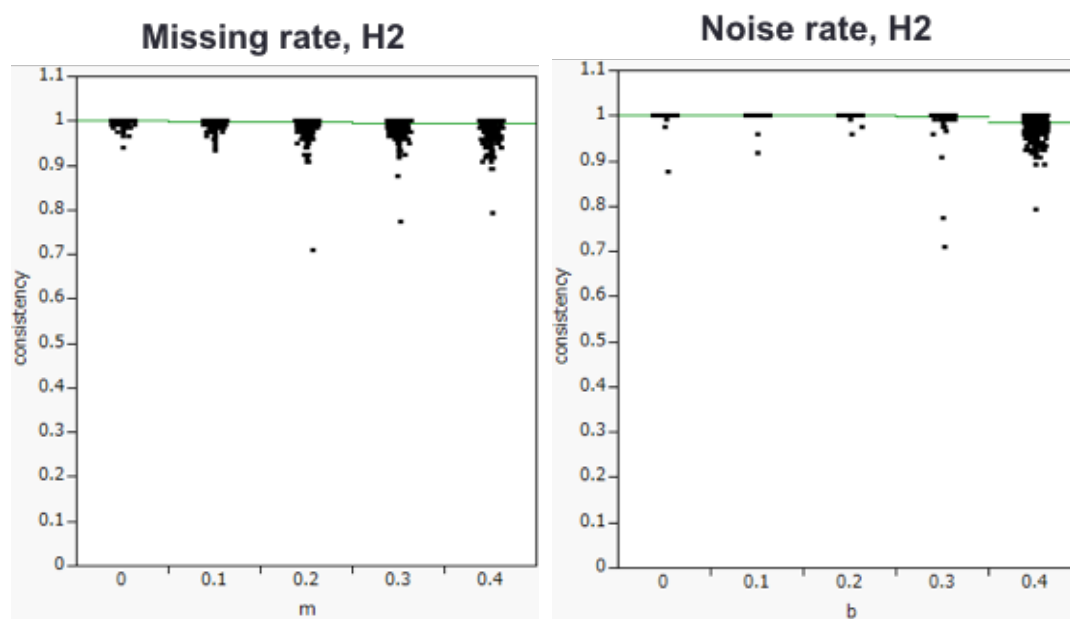

Fig. S1d

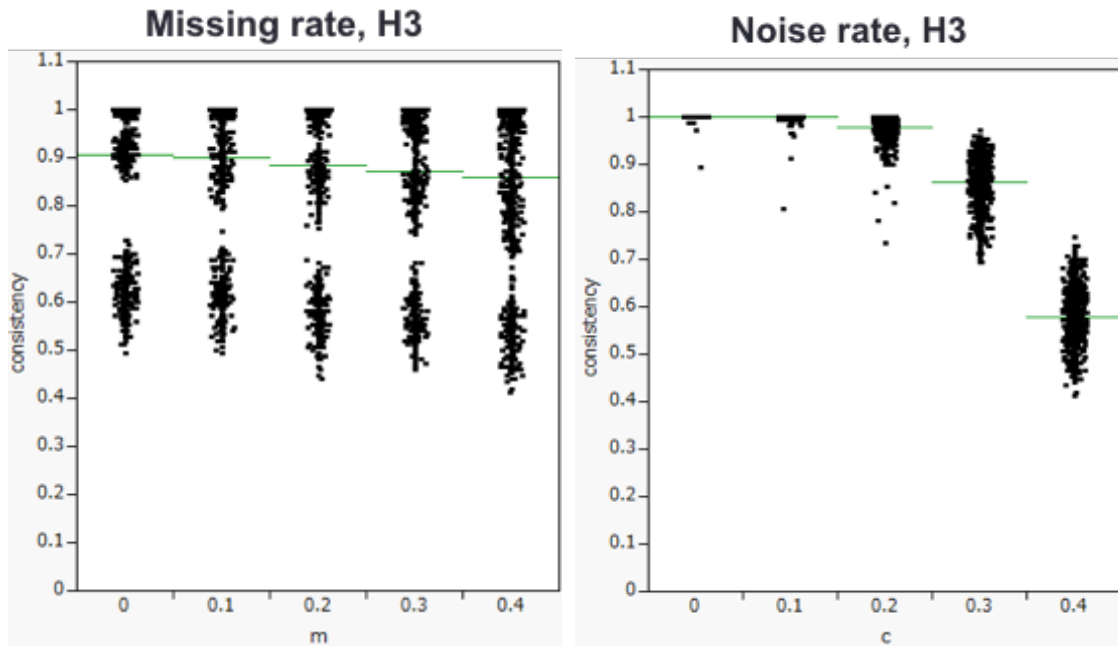

**Fig. S1| Impact of noise and missing values on JNMF output matrices**

**(a)** Relationship between missing and noise parameters and consistency of predefined clusters on  $W$ . The regression model is  $y_W = 1.01 - 0.01a - 0.00b - 0.01c - 0.01m$  **(b)** Relationship between missing and noise parameters  $m, a$  and consistency of predefined clusters on  $H_1$ . The regression model is  $y_{H_1} = 1.01 - 0.04a + 0.00b + 0.00c - 0.02m$  **(c)** Relationship between missing and noise parameters  $m, b$  and consistency of predefined clusters on  $H_2$ . The regression model is  $y_{H_2} = 1.01 - 0.00a + 0.03b - 0.01c - 0.02m$  **(d)** Relationship between missing and noise parameters  $m, c$  and consistency of predefined clusters on  $H_3$ . The regression model is  $y_{H_3} = 1.11 - 0.03a - 0.02b - 0.98c - 0.12m$

**Fig. S2**

Fig. S2a

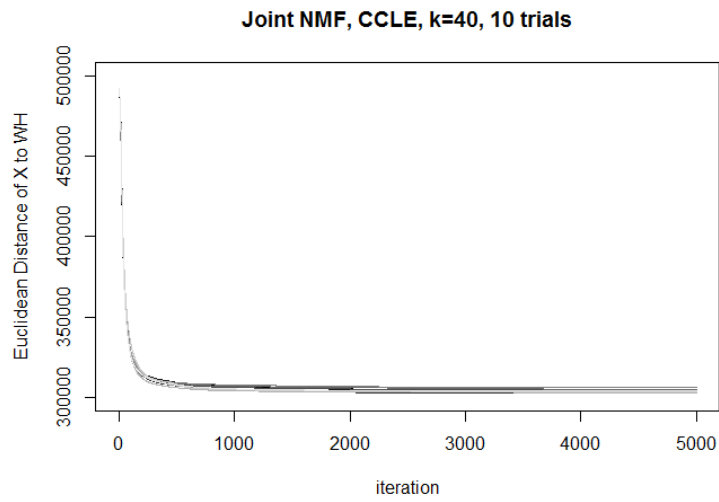

Fig. S2b

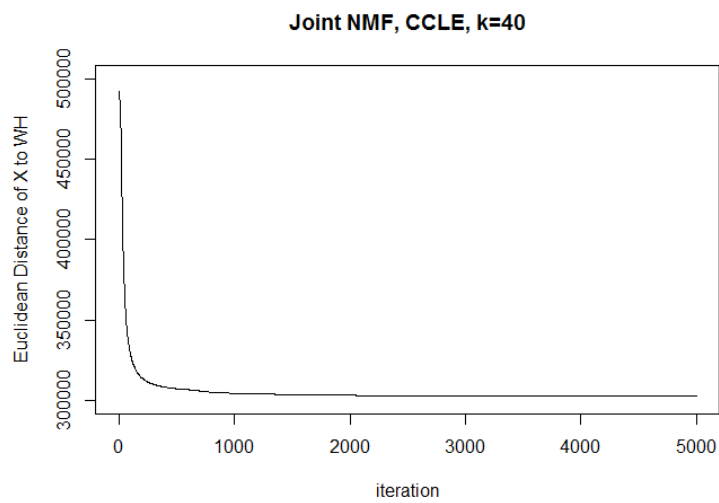

**Fig. S2 | Convergence of JNMF objective function**

**(a)** Each gray and black line shows trajectory of the JNMF residuals, computed with the objective function. **(b)** The trajectory of best result reached to the smallest objective function value among the 10 trials.

**Fig. S3**

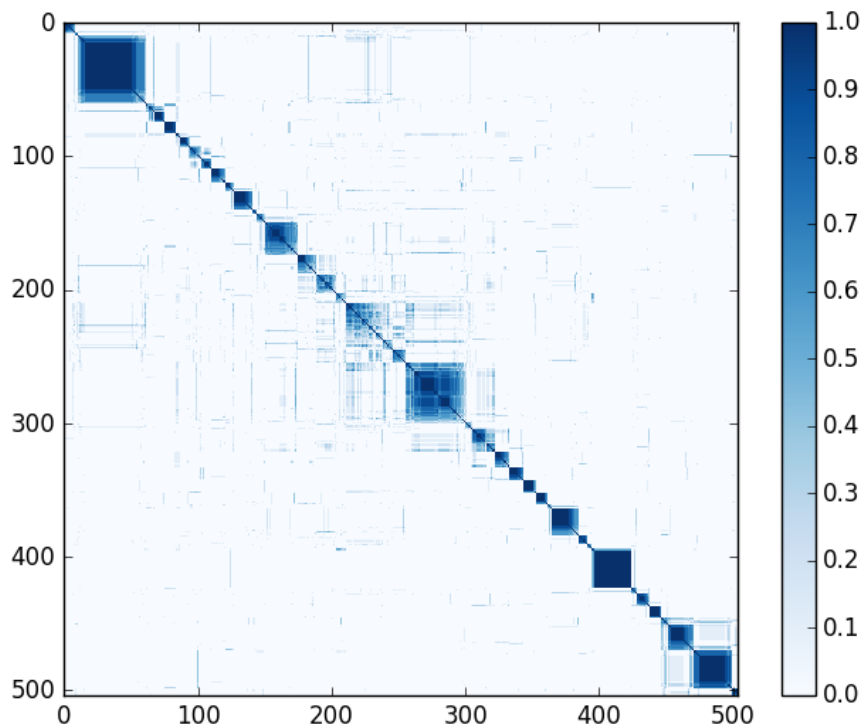

**Fig. S3| Consensus matrix of the cancer cell line encyclopedia data**

This consensus matrix shows reproducibility of JNMF output  $W$  in ten replicate trials. Both axes show cell lines in a cluster order. Blue components shows perfect grouping as in a cluster and white shows these cells are assigned in different clusters. Cophenetic correlation coefficient = 0.91.

**Fig. S4**

IPA\_MITF\_melanoma\_module12

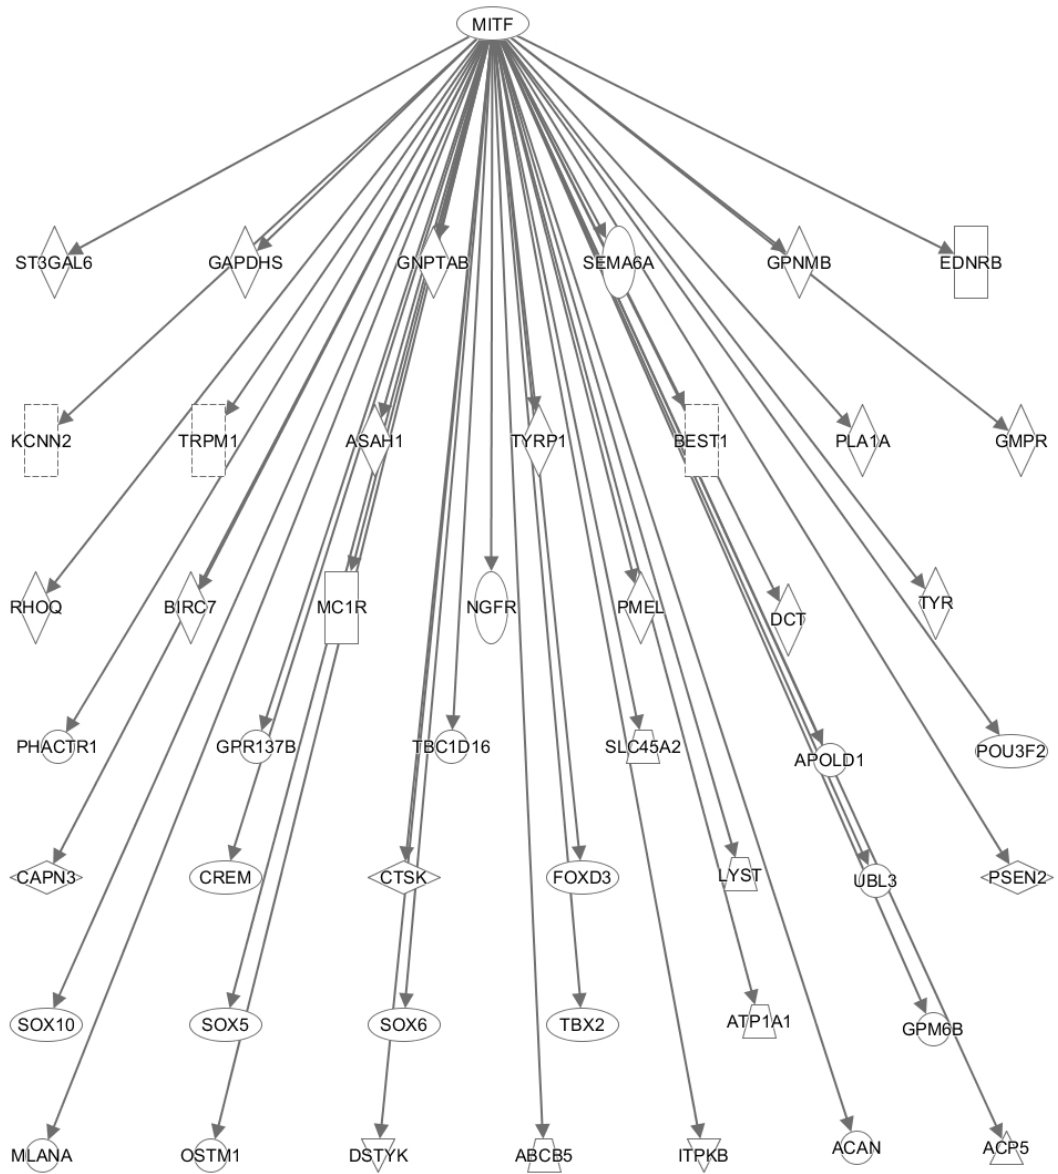

© 2000-2017 QIAGEN. All rights reserved.

**Fig. S4| MITF target genes in a co-module (#12)**

Upstream analysis in the Ingenuity Pathway Analysis tool detected 47 genes out of 354 genes in a module (#12) as MITF downstream genes. Solid arrows mean that expression levels of these 47 mRNAs are reported as directly regulated by the transcription factor MITF.

**Fig. S5**

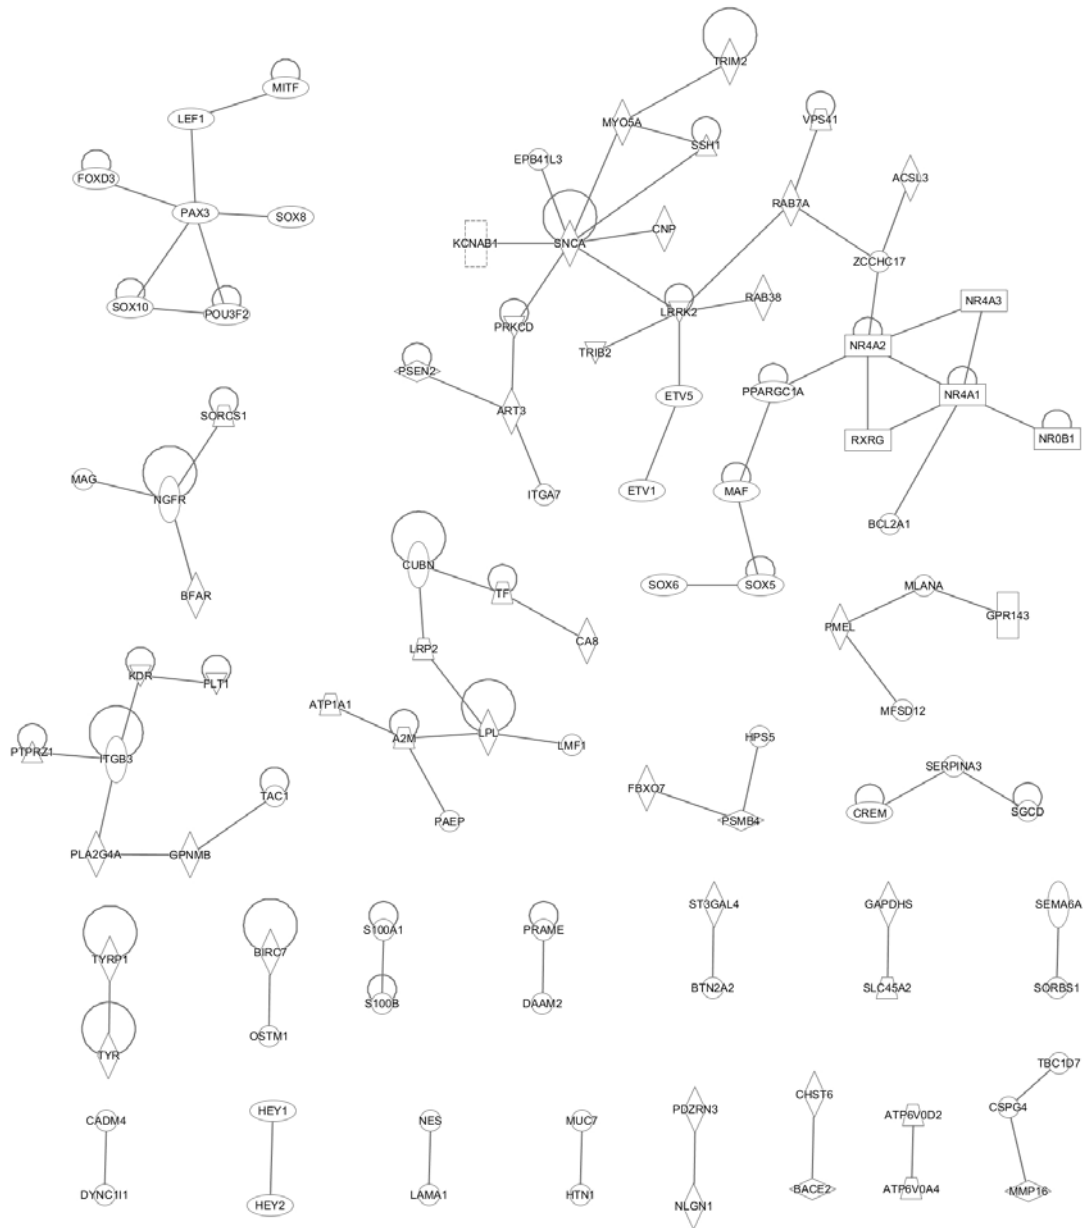

© 2000-2018 QiAGEN. All rights reserved.

**Fig. S5| Protein-protein interaction networks in a co-module (#12)**

Protein-protein interaction analysis in the Ingenuity Pathway Analysis tool detected a sub-network of melanoma-related transcription factors, MITF, PAX3, SOX8, SOX10, POU3F2, FOXD3, and LEF1, out of 354 genes in a module (#12). Edges are based on the evidence of protein-protein interactions between nodes from literature.



Fig. S6

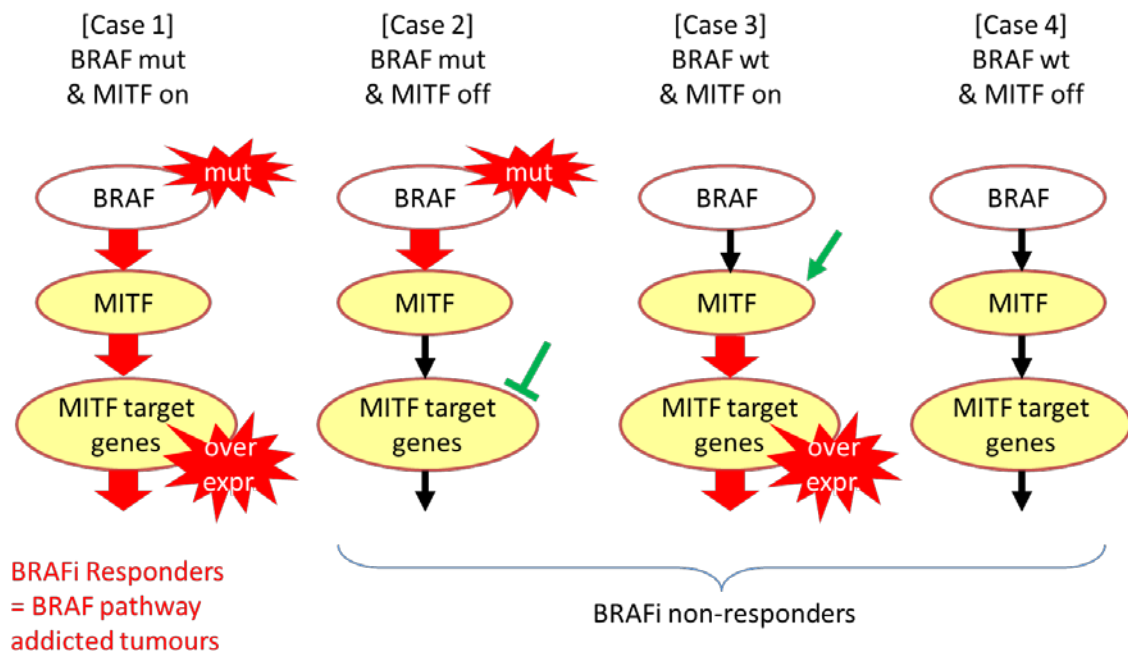

Fig. S6| MITF activation status as the additional biomarker for BRAFi

The illustration describes activation of the BRAF/MITF axis might be a more appropriate biomarker for predicting the efficacy of a BRAF inhibitor than BRAF mutation alone.
